# Supplementary figures and images for: Effects of Degradation on Microbial Communities of an Amazonian Mangrove
Source: MDPI journal article supplement (doi:10.3390/microorganisms11061389), 2023-05-25

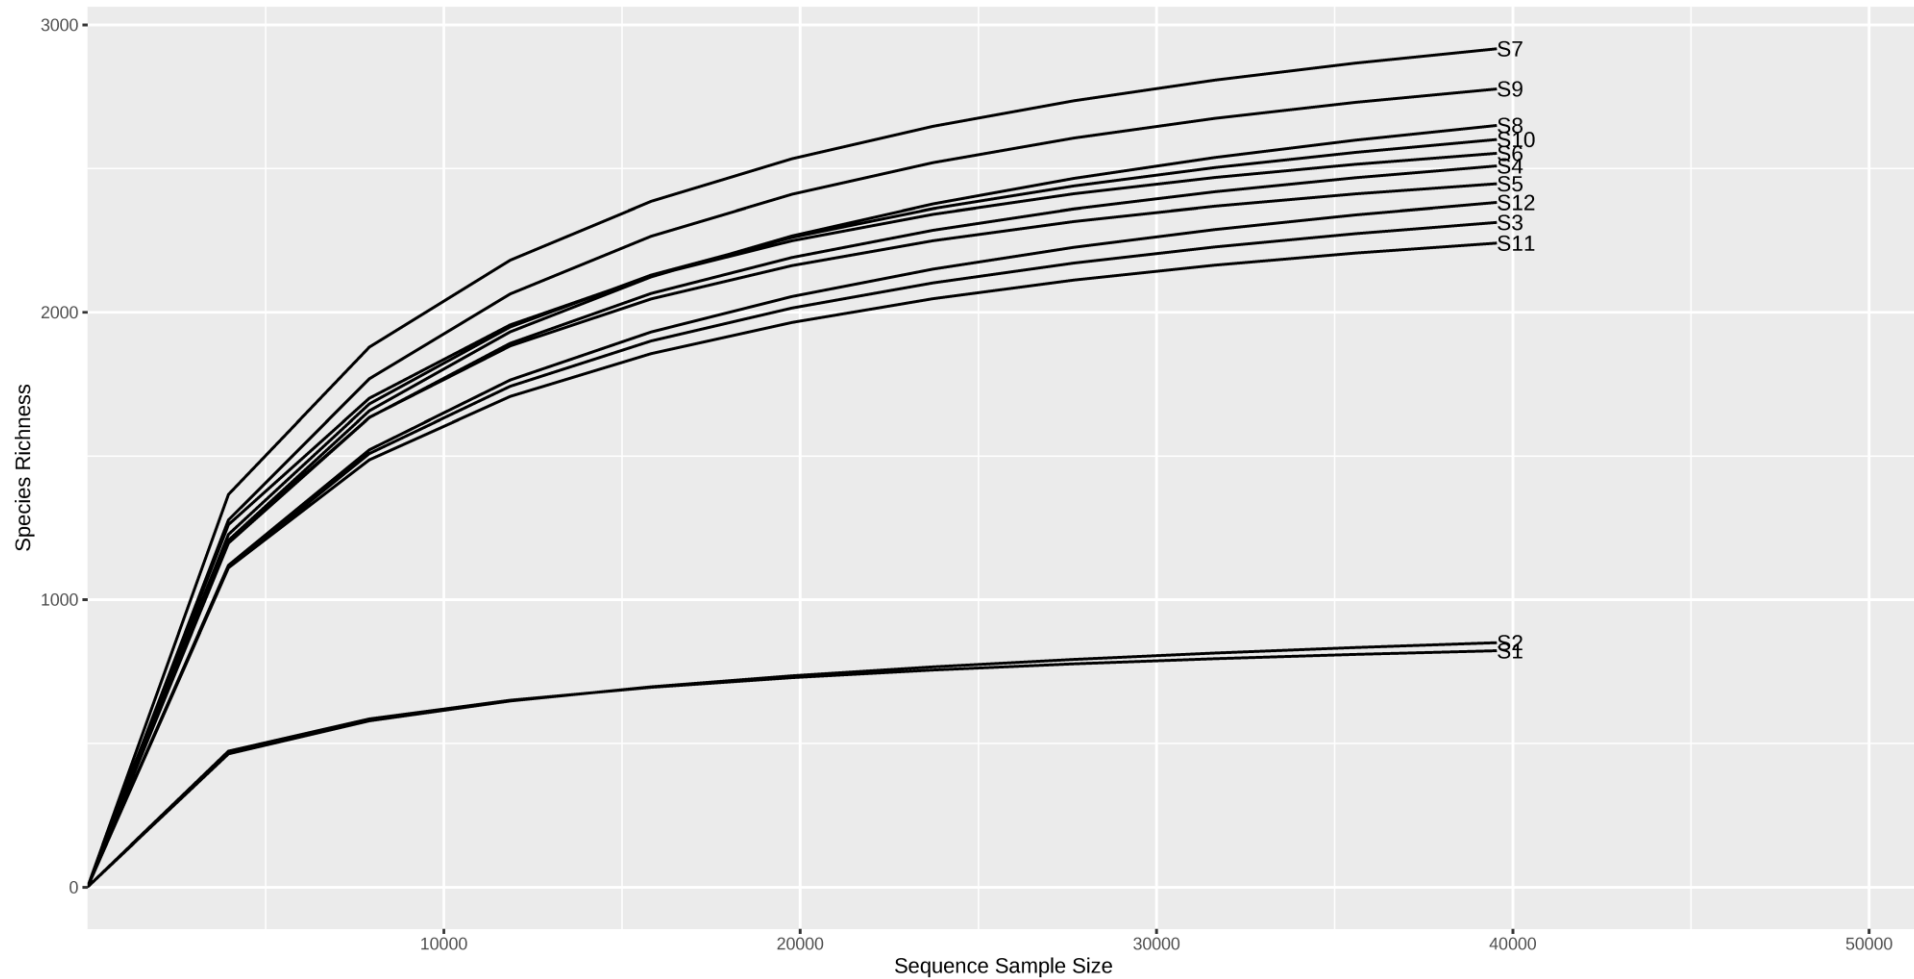

Figure S1: Rarefaction curve

Supplement: s1 [file s1]
